# Supplementary material
Source: PubMed Central journal article supplement (PMC138639)

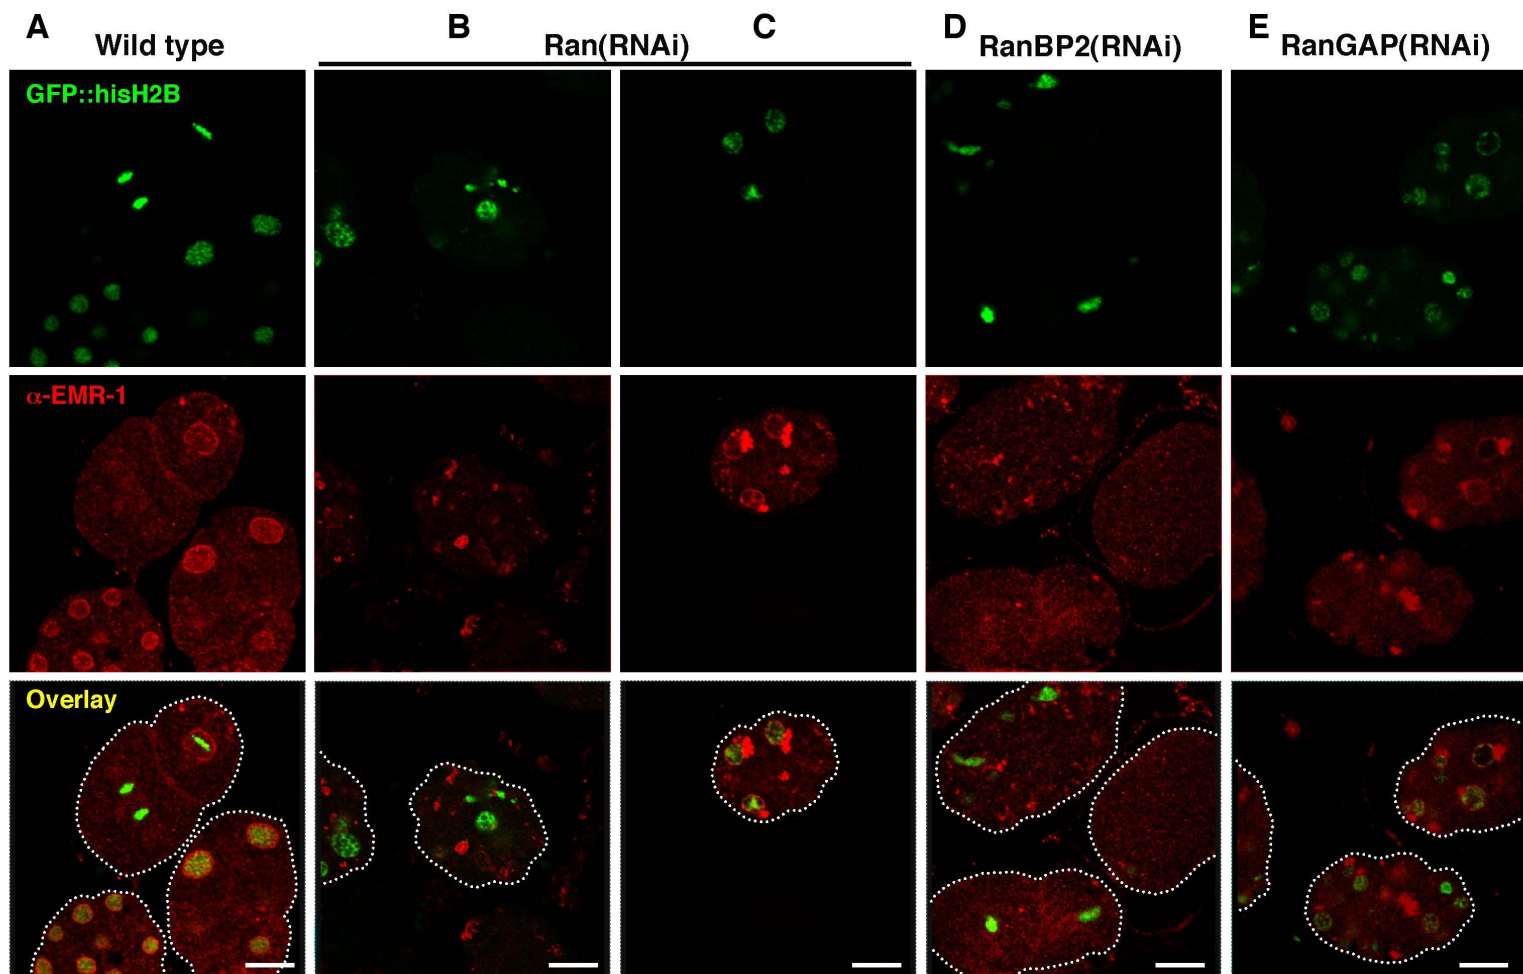

Supplement: mbc_13_12_4355__1.pdf [file mbc_13_12_4355__1.pdf]
